# Supplementary material for: A palladium(0)–threonine complex immobilized on the surface of magnetic mesocellular foam: an efficient, stable, and magnetically separable nanocatalyst for Suzuki, Stille, and Heck cross-coupling reactions
Source: Royal Society of Chemistry journal article supplement (doi:10.1039/d3ra02721j), 2023-01-01
Supplement: d3ra02721j1.pdf [file d3ra02721j1.pdf]

## Supporting Information

### **Palladium(0)-threonine complex immobilized on surface magnetic mesocellular foams: an efficient, stable and magnetically separable nanocatalyst for Suzuki, Stille and Heck cross-coupling reactions**

Zeinab Shirvandi<sup>a</sup>, Arash Ghorbani-Choghamarani<sup>\*b,c</sup> and Amin Rostami<sup>\*a</sup>

---

<sup>a</sup> Department of Chemistry, Faculty of Science, University of Kurdistan, Zip Code 66177-15175, Sanandaj, Iran. Email: a.rostami@uok.ac.ir

<sup>b</sup> Department of Chemistry, Faculty of Science, Ilam University, P.O. Box 69315516, Ilam, Iran

<sup>c</sup> Department of Organic Chemistry, Bu-Ali Sina University, 6517838683 Hamedan, Iran. Email: a.ghorbani@basu.ac.ir; arashghch58@yahoo.com

#### **Experimental**

##### **General information**

Triblock copolymer P123, 1, 3, 5-trimethyl benzene (TMB), tetraethoxysilane (TEOS), ammonium fluoride (NH<sub>4</sub>F), and all other commercially available substances and solvents were purchased from Aldrich and Merck Chemical Companies and used without additional purification.

Fourier-transform infrared (FT-IR) spectra of the nanocatalyst were obtained by a VERTEX 70 model BRUKER FT-IR spectrophotometer in the range of 400 to 4000 cm<sup>-1</sup>. X-ray diffraction (XRD) patterns measurements were performed at room temperature by using an X'Pert PRO MPD instrument from Panalytical Company under Cu K $\alpha$  radiation at 40 kV and 30 mA. Thermal gravimetric analysis (TGA) measurements of prepared samples were performed on a DTG-60 Thermal Analysis system with a heating rate of 10 °C min<sup>-1</sup> in the temperature range of 30–900 °C. Brunauer–Emmett–Teller (BET) specific surface areas and pore size distributions of the nanostructures were determined by N<sub>2</sub> physisorption using an Asap 2020 device from Micromeritics Company. The microscopic morphology of the nanostructure was characterized by the FESEM-TESCAN MIRA3 scanning electron microscopy (SEM). In addition, the analysis of chemical elements on the components of nanostructure was determined using the energy dispersive X-ray (EDS) and wavelength dispersive X-ray (WDX). Also, the Palladium content of the nanocatalyst was determined using inductively coupled plasma-optical emission spectrometry (ICP-OES) (on a 730-ES-Varian device). The magnetoresistance of the nanoparticles was obtained on a vibrating sample magnetometer (VSM, MDKFD, Iran) at a maximum applied field of 25 KOe. <sup>1</sup>HMR (300 MHz) spectra was recorded to confirm the structures of the materials with CDCl<sub>3</sub> as solvent.

## Selected spectral data

**2-Methyl-1, 1'-biphenyl**, Mp: Oil<sup>1</sup>, <sup>1</sup>H NMR (300 MHz, CDCl<sub>3</sub>):  $\delta$  (ppm)= 7.53-7.48 (m, 2H), 7.47-7.42 (m, 3H), 7.39-7.35 (m, 4H), 2.38 (s, 3H).

**4-Chloro-1, 1'-biphenyl**, Mp: 77-79 °C<sup>2</sup>, <sup>1</sup>H NMR (300 MHz, CDCl<sub>3</sub>):  $\delta$  (ppm)= 7.60-7.56 (m, 2H), 7.56-7.52 (m, 2H), 7.51-7.46 (m, 2H), 7.44-7.40 (m, 1H), 7.38-7.35 (m, 2H).

**Butyl 3-(4-methoxyphenyl)acrylate**, Mp: Oil<sup>3</sup>, <sup>1</sup>H NMR (300 MHz, CDCl<sub>3</sub>):  $\delta$  (ppm)= 7.67 (d,  $J$ = 15.6 Hz, 1H), 7.51 (d,  $J$ = 8.7 Hz, 2H), 6.93 (d,  $J$ = 8.7 Hz, 2H), 6.35 (d,  $J$ = 16.0 Hz, 1H), 4.23 (t,  $J$ = 6.4 Hz, 2H), 3.86 (s, 3H), 1.74-1.68 (m, 2H), 1.52-1.43 (m, 2H), 1.01 (t,  $J$ = 7.6 Hz, 3H).

**Butyl 3-(2-methylphenyl)acrylate**, Mp: Oil<sup>4</sup>, <sup>1</sup>H NMR (300 MHz, CDCl<sub>3</sub>):  $\delta$  (ppm)= 8.02 (d,  $J$ = 16.0 Hz, 1H), 7.60-7.58 (m, 1H), 7.31-7.30 (m, 1H), 7.26-7.20 (m, 2H), 6.40 (d,  $J$ = 16.0 Hz, 1H), 4.25 (t,  $J$ = 6.8 Hz, 2H), 2.48 (s, 3H), 1.77-1.70 (m, 2H), 1.53-1.43 (m, 2H), 1.01 (t,  $J$ = 7.2 Hz, 3H).

1. O. Diebolt, P. Braunstein, S. P. Nolan and C. S. Cazin, *Chem. Commun.*, 2008, 3190-3192.
2. M. C. Hong, M. C. Choi, Y. W. Chang, Y. Lee, J. Kim and H. Rhee, *Adv. Synth. Catal.*, 2012, **354**, 1257-1263.
3. A. Ghorbani-Choghamarani, B. Tahmasbi, R. H. Hudson and A. Heidari, *Microporous Mesoporous Mater.*, 2019, **284**, 366-377.
4. D. Liu, C. Zhang, F. Wang, Z. Huang, N. Zhang, H. Zhou and Y. Kuang, *J. Mater. Chem.*, 2015, **3**, 16583-16589.

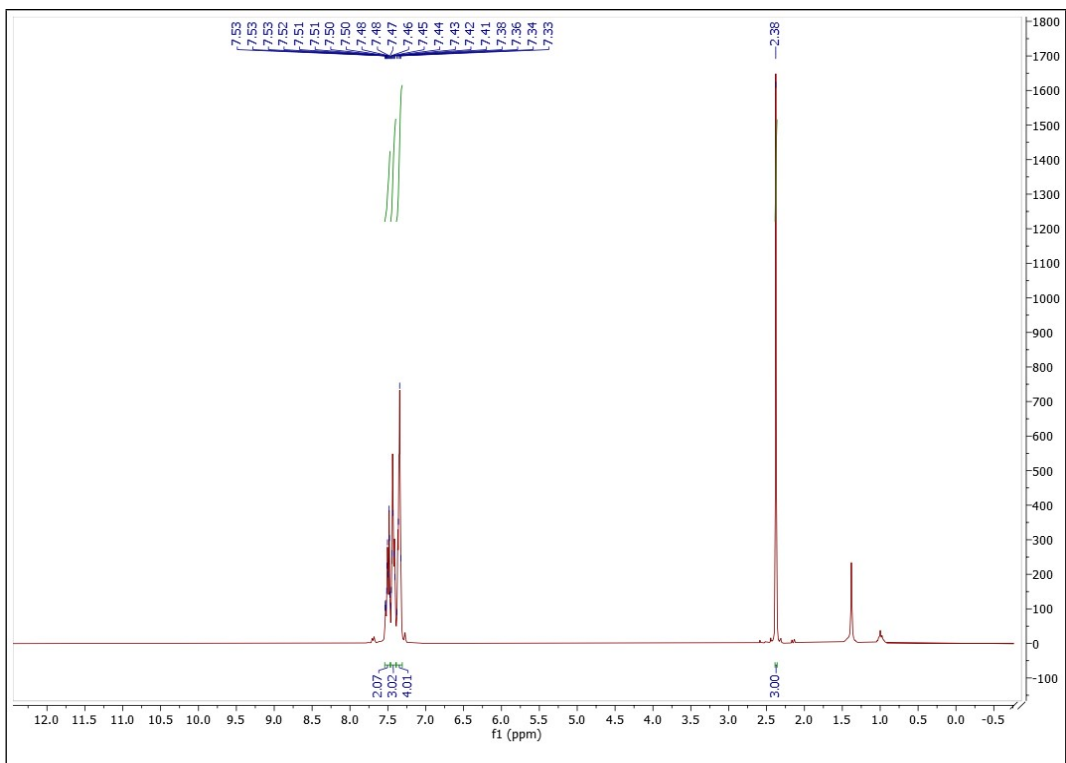

$^1\text{H}$  NMR spectrum of 2-Methyl-1, 1'-biphenyl, in  $\text{CDCl}_3$

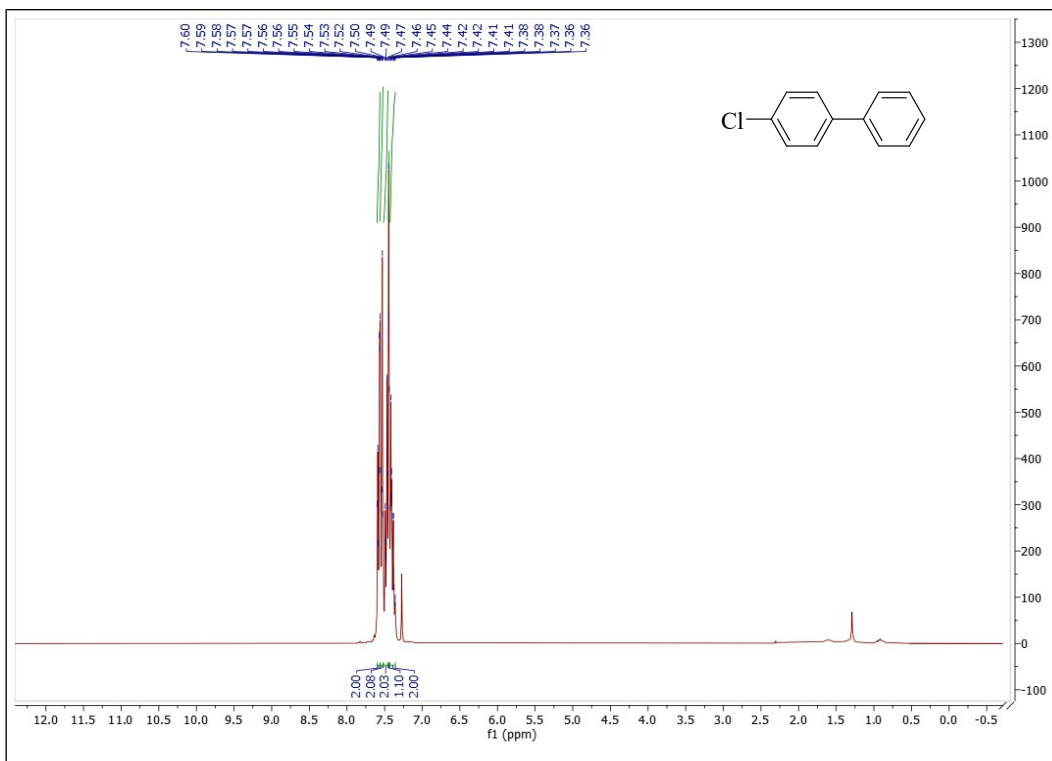

**<sup>1</sup>H NMR spectrum of 4-Chloro-1, 1'-biphenyl, in CDCl<sub>3</sub>**

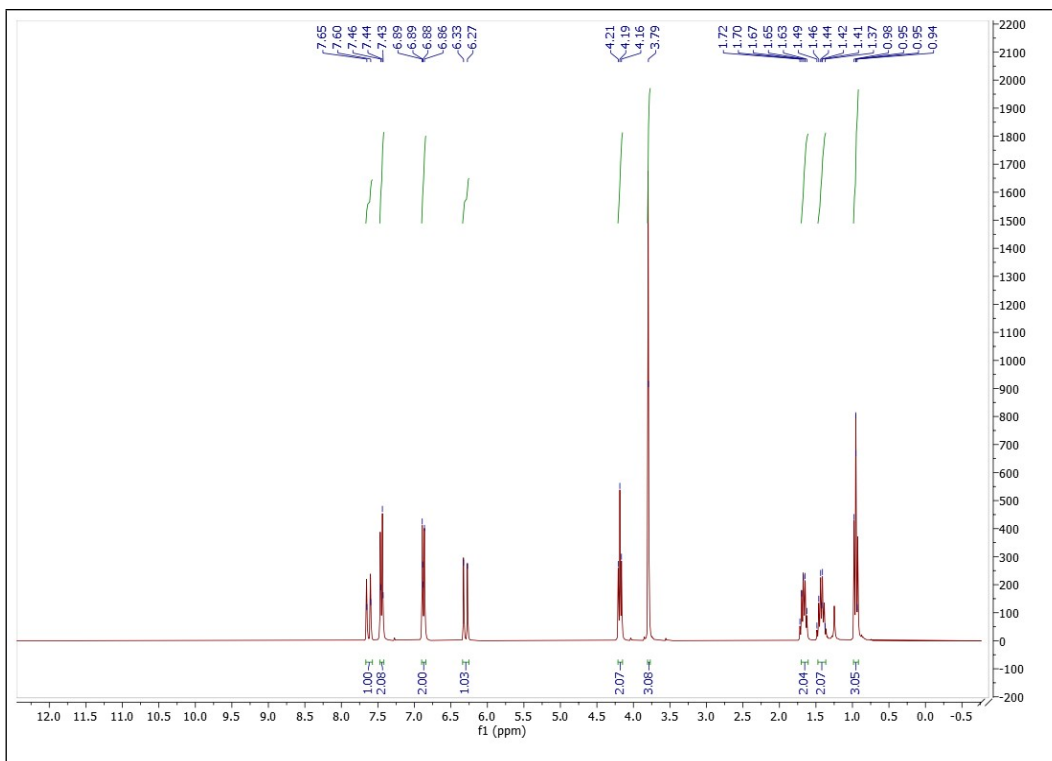

**<sup>1</sup>H NMR spectrum of Butyl 3-(4-methoxyphenyl)acrylate, in CDCl<sub>3</sub>**

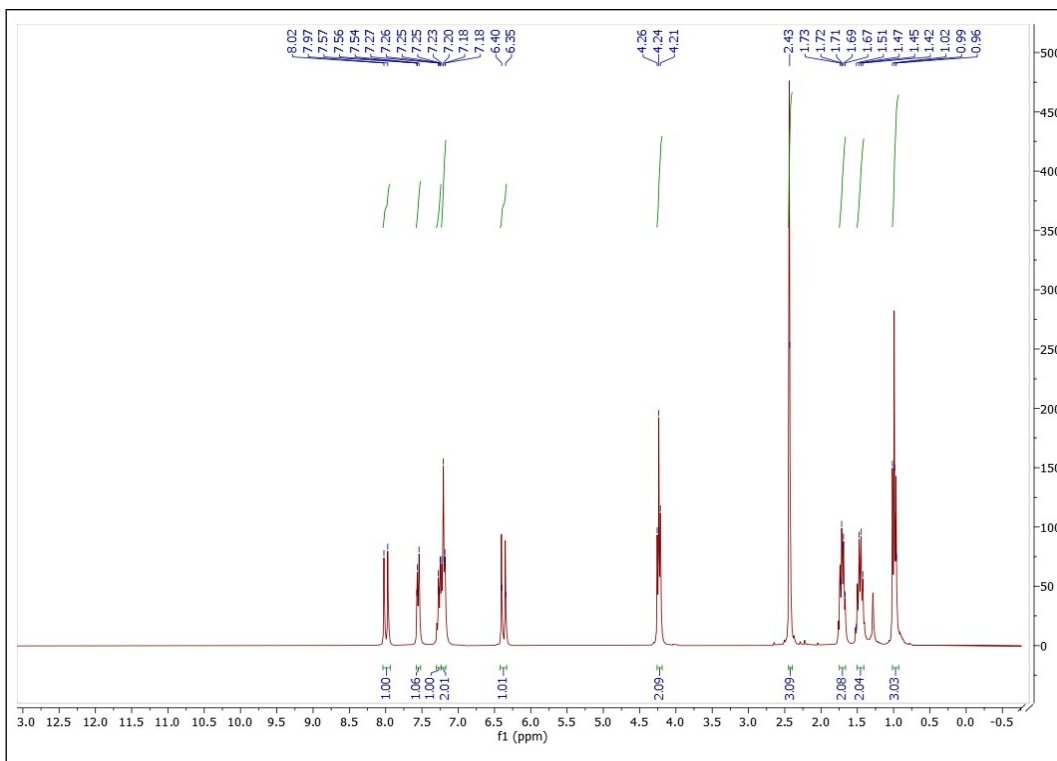

<sup>1</sup>H NMR spectrum of Butyl 3-(2-methylphenyl)acrylate, in CDCl<sub>3</sub>
